# Supplementary material
Source: JCI journal article supplement (doi:10.1172/jci183560)
Supplement: sd1 [file 1]

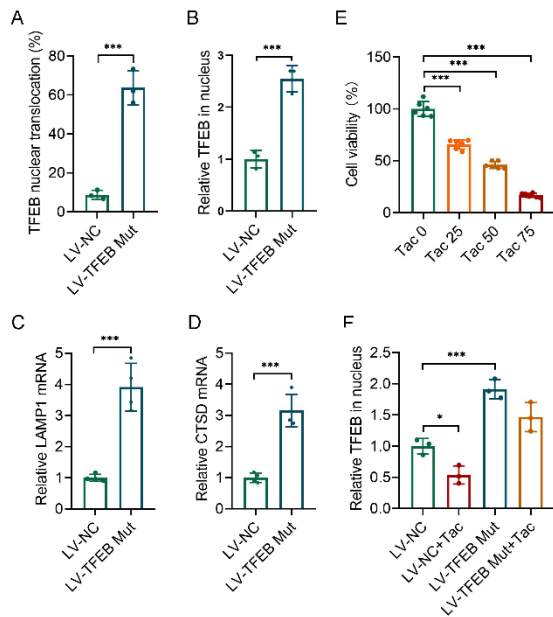

1  
2  
3  
4  
5  
6  
7  
8  
9  
10  
11  
12  
13

**Supplemental Figure 1.** (A) TFEB fluorescence intensity in HK-2 cells infected with empty (LV-NC) or *TFEB*-S142A/S211A overexpressing lentivirus (LV-*TFEB* Mut) was quantified (n=3). (B) TFEB expression levels in HK-2 cells infected with LV-NC or LV-*TFEB* Mut were normalized to H3 (n=3). (C, D) *LAMP1* and *CTSD* mRNA levels in LV-NC and LV-*TFEB* Mut cells were determined by qPCR (n=3). (E) Cell viability of HK-2 cells treated with different concentrations of tacrolimus (25, 50, 75  $\mu$ M). (F) TFEB expression levels in HK-2 cells infected with LV-NC or LV-*TFEB* Mut treated with or without tacrolimus were normalized to H3 (n=3). Data are shown as mean  $\pm$  SD and analyzed by two-tailed Student's t-tests (A-D) and one-way ANOVA (E and F). \*P < 0.05, \*\*P < 0.01, \*\*\*P < 0.001.

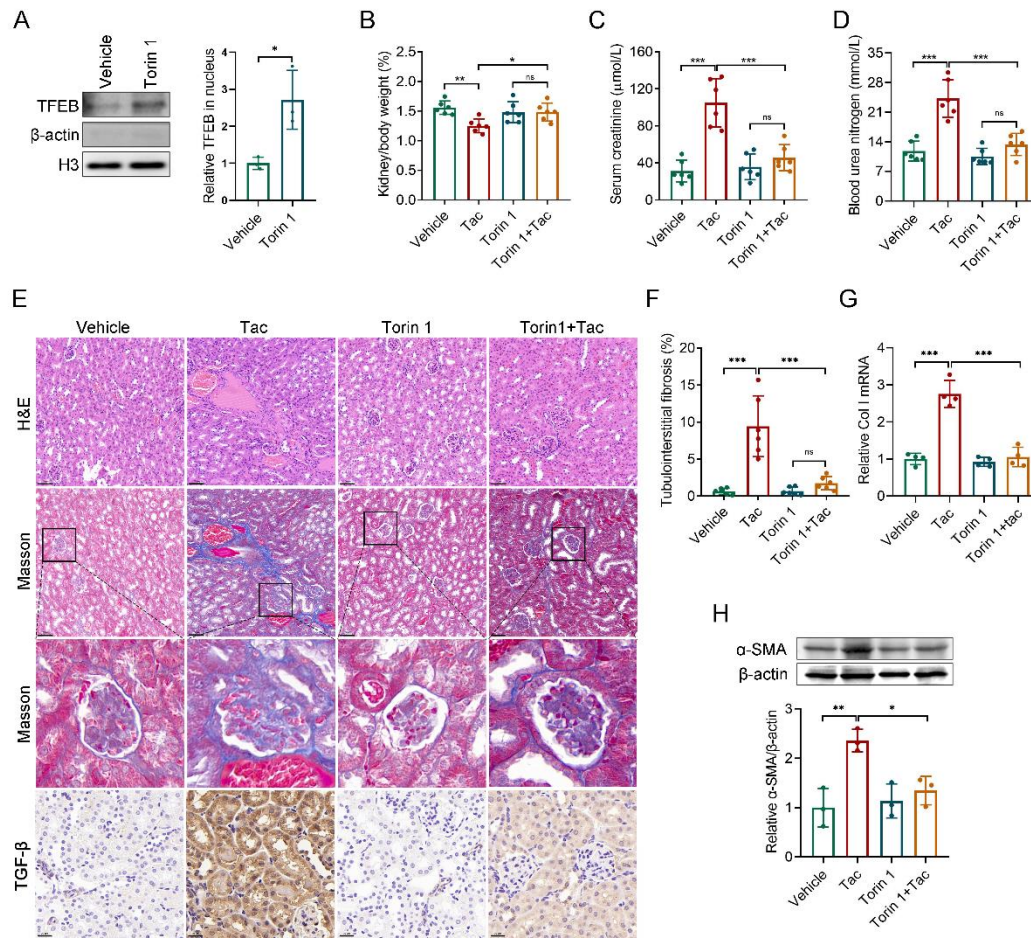

14

15 **Supplemental Figure 2. TICN was alleviated by the activation of TFEB by torin**  
 16 **1 in vivo.** (A) TFEB nuclear translocation in kidney tissues of mice treated with  
 17 vehicle or Torin 1 was evaluated by western blot (n=3). (B) The kidney/body weight  
 18 ratio of mice was recorded (n=6). The levels of (C) serum creatinine and (D) blood  
 19 urea nitrogen in mice were determined with commercial kits (n=6). (E)  
 20 Representative images of H&E- and Masson-stained kidney sections (scale bar, 50  
 21 μm), as well as TGF-β immunohistochemical staining (scale bar, 20 μm). (F) The  
 22 proportion of tubulointerstitial fibrosis in mouse renal tissue stained by Masson was  
 23 quantified (n=6). (G) *Colla1* mRNA and (H) α-SMA protein in mouse renal tissue  
 24 was measured by qPCR and western blot, respectively (n=3). Data are shown as mean  
 25 ± SD and analyzed by two-tailed Student's t-tests (A) and one-way ANOVA (B-D  
 26 and F-H). \*P < 0.05, \*\*P < 0.01, \*\*\*P < 0.001.

27

28

29

30 **Supplemental Table.** The overlapping genes of TFEB direct target genes identified in  
31 human embryonic kidney 293 cells<sup>[23]</sup> and differentially expressed genes in the  
32 kidneys of wild-type or kidney-specific TFEB overexpressed mice<sup>[24]</sup>

|                |                |                |                |
|----------------|----------------|----------------|----------------|
| <i>Actr1a</i>  | <i>Gadd45g</i> | <i>Pim1</i>    | <i>Soat1</i>   |
| <i>Atf5</i>    | <i>Hsd11b2</i> | <i>Rabgef1</i> | <i>Specc1</i>  |
| <i>Cdc25b</i>  | <i>Il11</i>    | <i>Rps6ka1</i> | <i>Tbc1d14</i> |
| <i>Cln3</i>    | <i>Itfg2</i>   | <i>Scamp5</i>  | <i>Tbx3</i>    |
| <i>Cyp2s1</i>  | <i>Map3k1</i>  | <i>Sfxn3</i>   | <i>Tmprss2</i> |
| <i>Eral1</i>   | <i>Mlph</i>    | <i>Slc20a1</i> | <i>Trib3</i>   |
| <i>Gadd45a</i> | <i>Pdgfa</i>   | <i>Slc38a1</i> | <i>Wdfy1</i>   |

33

34

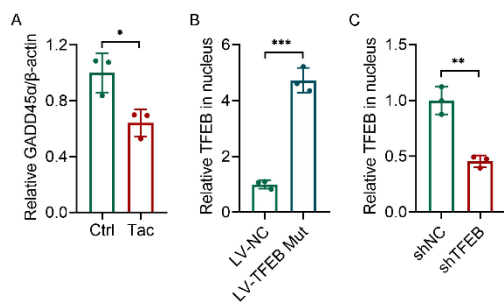

35

36 **Supplemental Figure 3.** (A) GADD45 $\alpha$  expression levels in mice treated with  
37 vehicle or tacrolimus were quantified (n=3). (B) TFEB expression levels in HK-2  
38 cells infected with LV-NC or LV-*TFEB* Mut were normalized to H3 (n=3). (C) TFEB  
39 expression levels in HK-2 cells infected with shNC or sh*TFEB* were normalized to H3  
40 (n=3). Data are shown as mean  $\pm$  SD and analyzed by two-tailed Student's t-tests. \*P  
41 < 0.05, \*\*P < 0.01, \*\*\*P < 0.001.

42

43

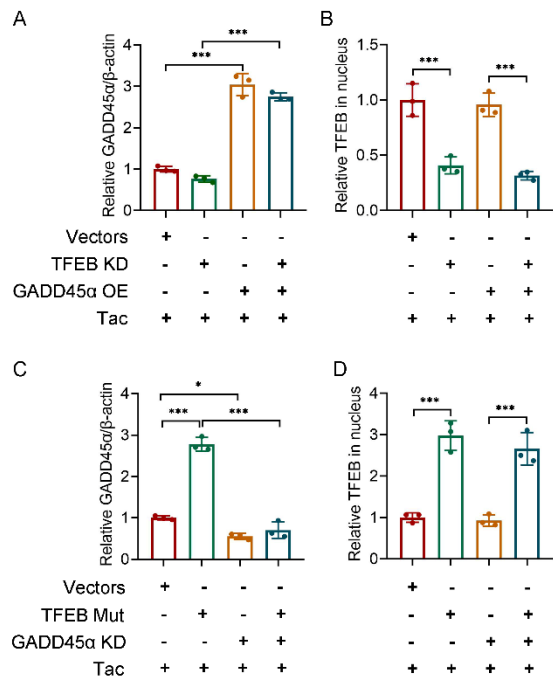

44

45 **Supplemental Figure 4.** Densitometric analysis of **(A)** TFEB and **(B)** GADD45α  
 46 blots in HK-2 cells transfected with control vectors, *TFEB* shRNA, *LV-GADD45A* or  
 47 combination of the latter two and then treated with Tac (50 μM for 24 h) (n=3).  
 48 Densitometric analysis of **(C)** TFEB and **(D)** GADD45α blots in HK-2 cells  
 49 transfected with control vectors, *LV-TFEB* Mut, *shGADD45A* or combination of the  
 50 latter two and then treated with Tac (50 μM for 24 h) (n=3). Data are shown as mean ±  
 51 SD and analyzed by one-way ANOVA. \*P < 0.05, \*\*P < 0.01, \*\*\*P < 0.001.
